# Supplementary material for: RapID Cell Counter: Semi-Automated and Mid-Throughput Estimation of Cell Density within Diverse Cortical Layers
Source: eNeuro. 2021 Nov 30;8(6):ENEURO.0185-21.2021. doi: 10.1523/ENEURO.0185-21.2021 (PMC8638678; doi:10.1523/ENEURO.0185-21.2021)
Supplement: Extended Data Figure 1-1 — Parameters and specifications for RapID detection of diverse neuron morphologies and fluorescence/co-localization (Extended Data Table). Parameters (max σ, min σ, overlap, and threshold) used for quantification of all image types analyzed for this article are listed (e.g., cortical neurons, astrocytes, dopaminergic neurons, etc.). Additionally, details on the developmental stage, cortical markers used for specification of neuron types as well as use of cytoplasmic or nuclear staining are listed to aid others to use RapID for their experiments and image specifications. Download Figure 1-1, XLS file. [file enu-eN-OTM-0185-21-s02.xls]

## Sheet: Figure1-1.ParametersRapID
Figure 1-1. Parameters and specifications for RapID detection of diverse neuron morphologies and fluorescence/co-localization
Sample	Age	Type of Cell	Type of Staining	Cortical Marker	Max Sigma	Min Sigma	Overlap	Threshold	Microscope type (Z-projection method)	Image Size (Wide x length pixels)	Magnification	Colors present (Channels)	Pixels Density (Image Resolution)	File Type
SRGAP2A	E18.5	Cortical Neuron	Cytoplasm/Nuclear	N/A	10	2	0.5	0.1	Epifluorescence	1296x966	10x	2	72 px/in	tiff
SRGAP2A	E18.5	Cortical Neuron	Cytoplasm/Nuclear	N/A	10	2	0.5	0.1	Epifluorescence	1296x966	10x	2	72 px/in	tiff
Control	E18.5	Cortical Neuron	Cytoplasm/Nuclear	N/A	10	2	0.5	0.1	Epifluorescence	1296x966	10x	2	72 px/in	tiff
shCul5	E19.5	Cortical Neuron	Cytoplasm/Nuclear	N/A	20	5	0.5	0.1	Epifluorescence	1296x966	10x	2	72 px/in	tiff
Control	E19.5	Cortical Neuron	Cytoplasm/Nuclear	N/A	20	5	0.5	0.1	Epifluorescence	1296x966	10x	2	72 px/in	tiff
Rbx2/NCRE Ctip-2	P0	Cortical Neuron	Nuclear	Ctip2+	10	2	0.5	0.1	Epifluorescence	1296x966	10x	3	72 px/in	tiff
Rbx2/NCRE Cux1	P0	Cortical Neuron	Nuclear	Cux1	10	2	0.5	0.1	Epifluorescence	1296x966	10x	3	72 px/in	tiff
Control Ctip-2	P0	Cortical Neuron	Nuclear	Ctip2+	10	2	0.5	0.1	Epifluorescence	1296x966	10x	3	72 px/in	tiff
Control Cux1	P0	Cortical Neuron	Nuclear	Cux1	10	2	0.5	0.1	Epifluorescence	1296x966	10x	3	72 px/in	tiff
Astrocytes	P30	Astrocytes	Cytoplasm/Nuclear	N/A	14	4	0.5	0.07	Zeiss Apotome (Variance Projection)	2752x2208	10x	2	300 px/in	tiff
Dopaminergic Neurons	P30	Dopaminergic Neurons	Cytoplasm	Tyrosine hydroxylase	17	0	0.5	0.1	Zeiss Apotome (Variance Projection)	8192x4054	10x	2	300 px/in	tiff
GFP/ChFP+	P0	Cortical Neurons	Nuclear	Ctip2+/Tbr1+	10	2	0.5	0.1	Laser Scanning Confocal (Maximum Projection)	1030x3888	20x	3	72 px/in	tiff
