# Supplementary material for: RapID Cell Counter: Semi-Automated and Mid-Throughput Estimation of Cell Density within Diverse Cortical Layers
Source: eNeuro. 2021 Nov 30;8(6):ENEURO.0185-21.2021. doi: 10.1523/ENEURO.0185-21.2021 (PMC8638678; doi:10.1523/ENEURO.0185-21.2021)
Supplement: Extended Data Figure 3-2 — Summary of neuronal migration and density counts using RapID (Extended Data Table). Means and SEM for all absolute counts and percentages of counts for each condition quantified using RapID, including SRGAP2, shCul5, and Rbx2cKO-Nes and corresponding controls. The period from IUE to dissection is indicated (e.g., E14–E18) as well as the numbers of individuals counted per condition (noted as n). Table results are plotted in Figures 2, 3. Download Figure 3-2, XLS file. [file enu-eN-OTM-0185-21-s08.xls]

## Sheet: Figure3-2.Summary_data_migratio
Figure 3-2. Summary of neuronal migration and density counts using RapID
		RapID Counts (Averages of percentages of counts)		RapID Counts (Averages of absolute counts)
	Assigned row	Mean	SEM	Mean	SEM
SRGAP2A (E14.5-E18.5) (n=3)	8	7.18	1.5389	7.66667	3.97678
	7	11.79	1.10932	11.2222	2.80432
	6	13.74	0.835564	13.2222	2.39083
	5	16.44	0.868739	13.6667	3.23751
	4	15.06	0.142519	14.4444	2.98349
	3	16.69	1.20377	15.7778	6.84574
	2	12.92	0.408284	16.2222	7.64328
	1	6.18	1.42463	13.6667	8.00231
SRGAP2C (E14.5-E18.5) (n=6)	8	2.02	0.81195	1	0.403687
	7	16.49	2.64127	7.5	1.72079
	6	23.68	3.05689	9.63889	2.20791
	5	19.52	1.22214	7.58333	1.22758
	4	15.78	1.90144	5.66667	0.720082
	3	10.77	1.76087	4.36111	1.10254
	2	8.99	1.58802	3.36111	0.491439
	1	2.76	0.653072	1.16667	0.352241
Control (E14.5-E18.5) (n=7)	8	5.08	2.24253	1.19048	0.47619
	7	19.54	3.74093	5.14286	1.07363
	6	20.52	3.00611	5.28571	0.918443
	5	19.08	2.69281	4.71429	0.703087
	4	14.33	2.0378	3.52381	0.470602
	3	11.31	2.88323	2.69048	0.646959
	2	7.92	1.65183	2.14286	0.404061
	1	2.22	0.839535	0.571429	0.188482
shCul5 (E14.5-E19.5) (n=3)	8	15.24	2.31959	54.5556	10.5573
	7	33.76	4.47678	116.333	7.1828
	6	19.85	3.10791	68.4444	6.4012
	5	8.69	1.9463	31.6667	9.17928
	4	5.58	1.68088	20.8889	8.40267
	3	5.57	0.988286	20.6667	5.60753
	2	5.79	1.47244	20.2222	6.40698
	1	5.52	1.12562	20.1111	4.83174
Control (E14.5-E19.5) (n=3)	8	9.06	2.29753	57.7778	23.4065
	7	19.8	1.27699	120.444	33.0378
	6	22.42	2.8389	124	14.0647
	5	14.83	2.86937	79.7778	4.29182
	4	9.03	1.79217	50.4444	8.71426
	3	7.34	0.429576	42.5556	6.58093
	2	8.23	1.05518	50.6667	14.8361
	1	9.29	3.58706	62.6667	33.217
Rbx2/NCRE Ctip-2 (P0) (n=6)	8	1.85	0.850774	7.6	4.36578
	7	5.6	1.12833	17.8	6.82202
	6	14.83	1.7248	37.8	8.15107
	5	19.27	0.27462	54.2	14.6745
	4	23.45	1.50592	67.2	20.3283
	3	19.4	0.977098	55	16.3034
	2	13.78	0.846279	39	10.4929
	1	1.82	0.695746	5.4	2.6
Rbx2/NCRE Cux1 (P0) (n=6)	8	4.95	0.860773	18.6	6.99714
	7	23.85	4.94512	64.2	13.8615
	6	23.5	1.73602	79	26.8756
	5	19.55	1.72029	73.8	27.672
	4	12.83	3.24156	58.8	27.0562
	3	6.41	1.98804	33.2	16.895
	2	5.96	0.701795	22.8	8.96883
	1	2.95	1.006	13.2	7.00286
Control Ctip-2 (P0) (n=6)	8	2.31	1.18485	14.4	7.51399
	7	2.48	1.07216	15.4	7.78203
	6	5.85	1.86317	29	10.6536
	5	27.14	4.88176	100.4	16.723
	4	22.92	2.80875	97.2	27.6684
	3	16.03	3.839	88	33.2009
	2	19.68	2.17935	89	25.2626
	1	3.58	0.928032	12.6	2.97658
Control Cux1 (P0) (n=6)	8	8.61	2.25946	24.2	8.61046
	7	28.85	4.14586	71.2	18.7894
	6	25.15	5.96802	63.6	18.6188
	5	9.5	2.89616	26.8	11.0064
	4	7.72	1.99676	22	9.34345
	3	7.17	1.56392	20.8	8.46995
	2	6.22	1.71243	19.2	8.77154
	1	6.78	1.96062	17.6	8.42378
* SEM=standard error of the mean
