# Supplementary material for: RapID Cell Counter: Semi-Automated and Mid-Throughput Estimation of Cell Density within Diverse Cortical Layers
Source: eNeuro. 2021 Nov 30;8(6):ENEURO.0185-21.2021. doi: 10.1523/ENEURO.0185-21.2021 (PMC8638678; doi:10.1523/ENEURO.0185-21.2021)
Supplement: Extended Data Figure 3-3 — Effects on neuronal migration in SRGAP2 and shCul5 samples quantified via RapID Cell Counter using Mann–Whitney test (Extended Data Table). The statistical significance of the effect on neuronal migration for each condition was determined by Mann–Whitney test (p value) of experimental condition versus control. Summary statistics are included of the median, difference of the medians between the two conditions, 96.67% confidence intervals as well as multiple testing correction (Bonferroni). These significant values (*p < 0.05) are plotted for SRGAP2 and shCul5 in Figure 2 and Rbx2cKO-Nes in Figure 3. Download Figure 3-3, XLS file. [file enu-eN-OTM-0185-21-s09.xls]

## Sheet: Figure3-3.MannWhitney_Migration
Figure 3-3. Effects on neuronal migration in SRGAP2 and shCul5 samples quantified via RapID Cell Counter using Mann-whitney test
							96.67% Confidence Interval
Condition (I)	Condition (J)	Assigned row	p-value (two-tailed)	Median (I)	Median (J)	Median difference	Lower bound	Upped bound	Bonferroni adjusted p-value
Control	SRGAP2A	8	0.2667	2.78	6.78	4	-10.07	8.79	0.8001
Control	SRGAP2A	7	0.2667	22.46	11.95	-10.51	-20.25	8.35	0.8001
Control	SRGAP2A	6	0.1833	19.37	13.13	-6.24	-19.34	2.24	0.5499
Control	SRGAP2A	5	>0.9999	16.93	16.41	-0.52	-12.89	5.7	1
Control	SRGAP2A	4	0.8333	12.07	15.03	2.96	-9.12	5.96	1
Control	SRGAP2A	3	0.1167	10.51	17.75	7.24	-8.48	13.46	0.3501
Control	SRGAP2A	2	0.1833	6.94	12.68	5.74	-1.27	11.29	0.5499
Control	SRGAP2A	1	0.0333	2.08	6.71	4.63	0.02	8.34	0.0999
Control	SRGAP2C	8	0.4423	2.78	1.66	-1.12	-9.03	1.86	1
Control	SRGAP2C	7	0.4452	22.46	16.51	-5.955	-14.12	10.95	1
Control	SRGAP2C	6	0.5338	19.37	20.98	1.61	-9.94	14.75	1
Control	SRGAP2C	5	0.9452	16.93	20.07	3.14	-8.04	8.65	1
Control	SRGAP2C	4	0.7308	12.07	15.22	3.145	-6.85	7.33	1
Control	SRGAP2C	3	0.8357	10.51	12.34	1.83	-10.78	7.8902	1
Control	SRGAP2C	2	0.6282	6.94	8.3	1.36	-4.41	6.64	1
Control	SRGAP2C	1	0.5297	2.08	3.375	1.295	-2.36	3.3	1
Control	shCul5	8	0.077	9.55	16.57	7.02	-1.44	13.27	0.231
Control	shCul5	7	0.0003	20.94	31.65	10.71	6.06	21.75	0.0009
Control	shCul5	6	0.2224	20.91	17.89	-3.02	-9.69	3.71	0.6672
Control	shCul5	5	0.0188	14.07	9.72	-4.35	-11.2	-0.79	0.0564
Control	shCul5	4	0.0315	7.34	5.8	-1.54	-6.4	-0.22	0.0945
Control	shCul5	3	0.0244	6.42	5.32	-1.1	-3.62	-0.65	0.0732
Control	shCul5	2	0.0503	8.64	5.46	-3.18	-5.26	0.04	0.1509
Control	shCul5	1	0.2224	9.55	5.25	-4.3	-8.95	1.61	0.6672
Control	Rbx2/NCRE - Ctip-2	8	0.8254	1.48	1.71	0.23	-4.27	3.49	1
Control	Rbx2/NCRE - Ctip-2	7	0.0952	1.69	5.43	3.74	-0.94	7.38	0.476
Control	Rbx2/NCRE - Ctip-2	6	0.0159	4.75	15.35	10.6	2.48	14.36	0.0795
Control	Rbx2/NCRE - Ctip-2	5	0.5476	21.94	19.53	-2.41	-22.58	1.58	1
Control	Rbx2/NCRE - Ctip-2	4	>0.9999	22.44	24.61	2.17	-6.97	9.42	1
Control	Rbx2/NCRE - Ctip-2	3	0.6905	17.51	20.42	5.647	-4.57	18.67	1
Control	Rbx2/NCRE - Ctip-2	2	0.0159	18.31	13.49	-4.82	-14.57	-1.27	0.0795
Control	Rbx2/NCRE - Ctip-2	1	0.0952	4.05	1.16	-2.89	-4.71	1.92	0.476
Control	Rbx2/NCRE - Cux1	8	0.1508	8.31	4.45	-3.86	-11.85	2.17	0.754
Control	Rbx2/NCRE - Cux1	7	0.4206	27.17	22.77	-4.4	-22.73	13.83	1
Control	Rbx2/NCRE - Cux1	6	0.8413	21.84	22.68	0.84	-25.32	9.64	1
Control	Rbx2/NCRE - Cux1	5	0.0317	6.9	21.26	14.36	2.28	19.55	0.1585
Control	Rbx2/NCRE - Cux1	4	0.2222	7.09	15.6	8.51	-6.09	12.98	1
Control	Rbx2/NCRE - Cux1	3	>0.9999	7.87	5.94	-1.93	-7.98	6.13	1
Control	Rbx2/NCRE - Cux1	2	0.6905	8.05	6	-2.05	-4.63	4.86	1
Control	Rbx2/NCRE - Cux1	1	0.2222	5.43	3.41	-2.02	-9.54	2.14	1
